# Supplementary material for: Hyperbolic Planforms in Relation to Visual Edges and Textures Perception
Source: PLOS journal article supplement (doi:10.1371/journal.pcbi.1000625), 2009-12-23
Supplement: S5 (10.1371/journal.pcbi.1000625.s005) [file journal.pcbi.1000625.s005]

## Supplementary text S4

We prove the following proposition that is stated without proof in the Section Methods:

**Proposition 1**  $\Gamma_{2,T}$  is a Fuchsian group for all  $T \neq 0$ .  $\Gamma_{4,T}$  (respectively  $\Gamma_{6,T}$ ) is a Fuchsian group if  $\cosh T \geq \sqrt{2}$  (respectively if  $\cosh T \geq 2$ ).

**Proof** According to [1, chapter 2], in order to prove that  $\Gamma_{n,t}$  is Fuchsian it is sufficient to prove that it is a discrete subgroup of  $SU(1, 1)$ . Since  $\Gamma_{n,t}$  is the free product of the two cyclic groups  $K_n$  and  $A_T$ . Theorem 1 in [2] gives a necessary and sufficient condition for such a subgroup of  $SU(1, 1)$  to be discrete. We define  $\lambda_p = 2 \cos \frac{\pi}{p}$ ,  $p \geq 2$ . Rosenberger's first theorem states that a sufficient condition for a free group product  $G$  of two cyclic subgroups of  $SU(1, 1)$  is that there exist two generators  $U$  and  $V$  such that

- $\text{Tr}(U) = \lambda_p$  or  $\text{Tr}(U) \geq 2$ ,  $\text{Tr}(V) = \lambda_q$  or  $\text{Tr}(V) \geq 2$ ,
- $UV \neq \pm \text{Id}$  when  $\text{Tr}(U) = \text{Tr}(V) = 0$ ,
- $\text{Tr}(UV^{-1}) \leq -2$ .

Let  $r_{2\pi/n}$  be the element of  $K_n$  corresponding to the rotation of angle  $\pi/n$ ,  $n = 2, 4, 6$ . It is clear that  $\Gamma_{n,t}$  is generated by the pair  $(r_{2\pi/n}, a_T)$  and that  $\text{Tr}(r_{2\pi/n}) = \lambda_n$  and  $\text{Tr}(a_T) = 2 \cosh t$ . On the other hand  $\text{Tr}(r_{2\pi/n}(a_T)^{-1}) = \lambda_n \cosh t$  which does not allow us to conclude.

Consider the case  $n = 2$  and note that  $K_{2,t}$  is also generated by the pair  $(U_2^T, V_2^T) = (r_\pi, r_\pi^{-1}a_T) = (r_\pi, r_{-\pi}a_T)$ . It is easy to check that  $\text{Tr}(U_2^T) = \lambda_2 = 0$ ,  $\text{Tr}(V_2^T) = \lambda_2 \cosh T = 0$ ,  $U_2^T V_2^T = a_T \neq \text{Id}$  if  $T \neq 0$  and  $\text{Tr}(U_2^T (V_2^T)^{-1}) = -2 \cosh T \leq -2$  for all  $T$ s.

Consider the case  $n = 4$  and note that  $K_{4,T}$  is generated by the pair  $(U_4^T, V_4^T) = (r_{\pi/2}, r_{\pi/2}^{-2}a_T) = (r_{\pi/2}, r_{-\pi/2}a_T)$ . It is straightforward to check that  $\text{Tr}(U_4^T) = \lambda_4$ ,  $\text{Tr}(V_4^T) = \lambda_2 \cosh T = 0$  and that  $\text{Tr}(U_4^T (V_4^T)^{-1}) = 2 \cos \frac{3\pi}{4} \cosh T = -\sqrt{2} \cosh T$ . Thus  $K_{4,T}$  is Fuchsian if  $\cosh T \geq \sqrt{2}$ .

Consider finally the case  $n = 6$  and note that  $K_{6,t}$  is generated by the pair  $(U_6^T, V_6^T) = (r_{\pi/6}, r_{\pi/6}^{-3}a_T) = (r_{\pi/6}, r_{-\pi/2}a_T)$ . It is straightforward to check that  $\text{Tr}(U_6^T) = \lambda_6$ ,  $\text{Tr}(V_6^T) = \lambda_2 \cosh T = 0$  and that  $\text{Tr}(U_6^T (V_6^T)^{-1}) = 2 \cos \frac{2\pi}{3} \cosh T = -\cosh T$ . Thus  $K_{6,T}$  is Fuchsian if  $\cosh T \geq 2$ . ■

## References

1. Katok S (1992) Fuchsian Groups. Chicago Lectures in Mathematics. The University of Chicago Press.
2. Rosenberger G (1972) Fuchssche Gruppen, die freies Produkt zweier zyklischer Gruppen sind, und die Gleichung  $x^2 + y^2 + z^2$ . Math Ann 199: 213–227.
