# Supplementary material for: Hyperbolic Planforms in Relation to Visual Edges and Textures Perception
Source: PLoS Comput Biol. 2009 Dec 24;5(12):e1000625. doi: 10.1371/journal.pcbi.1000625 (PMC2798746; doi:10.1371/journal.pcbi.1000625)
Supplement: Text S3 — A spherical model for the set SDP(2) of structure tensors. (0.06 MB PDF) [file pcbi.1000625.s004.pdf]

## Supplementary Text S3

We describe a spherical model for the set  $\text{SDP}(2)$  of structure tensors. The constraint that the determinant of the structure tensor should be equal to 1 is unnatural since in a given image the values of the structure tensors determinants are likely to vary over a wide range. We saw that the set of structure tensors,  $\text{SDP}(2)$ , was a foliated manifold whose co-dimension 1 leaves are isomorphic to  $H^2$ . We can also represent  $\text{SDP}(2)$  as the open unit ball of  $\mathbb{R}^3$ .

Let

$$\mathcal{T} = \begin{bmatrix} a & c \\ c & b \end{bmatrix}$$

be an element of  $\text{SDP}(2)$  of determinant equal to  $ab - c^2 = d^2 \geq 0$ . The change of variables

$$x_0 = \frac{a+b}{2} \quad x_1 = \frac{a-b}{2} \quad x_2 = c,$$

indicates that all tensors of determinant equal to  $d^2$  belong to the sheet of the hyperboloid of equation

$$x_0^2 - x_1^2 - x_2^2 = d^2$$

corresponding to positive values of  $x_0$ . If we perform the stereoscopic projection of this sheet with respect to the point of coordinates  $(0, 0, -d)$  in the plane of equation  $x_0 = 0$  one obtains the open disc of radius  $d \geq 0$ .

Consider now the subset of tensors with determinant less than or equal to 1 ( $0 \leq d \leq 1$ ). For each  $d$  we have a one to one correspondence between the tensors of determinant equal to  $d^2$  and the points of the open disk in the plane of equation  $x_0 = 0$  centered at the origin and of radius equal to  $d$ , hence with the same open disk centered on the  $x_0$ -axis but in the plane of equation  $x_0 = 1 - d$ . This establishes a one to one correspondence between the tensors of determinant between 0 and 1 (including these values) and the northern half open unit ball of center the origin.

Consider next the subset of tensors with determinant greater than or equal to 1 ( $d \geq 1$ ). The inverse of each such tensor has a determinant equal to  $0 < 1/d \leq 1$ . We have therefore a one to one correspondence between the set of tensors of determinant  $d^2$  and the points of the open disk of radius  $1/d$  in the plane of equation  $x_0 = 1/d - 1$  centered on the  $x_0$ -axis. This establishes a one to one correspondence between the tensors of determinant greater than or equal to 1 and the southern half open unit ball of center the origin.

Combining these two representations we obtain a one to one correspondence between the set  $\text{SDP}(2)$  of structure tensor and the open unit ball centered at the origin, see the Figure S1.

This representation has the following nice property. If  $\mathcal{T}$  is an element of  $\text{SSDP}(2)$ ,  $d\mathcal{T}$ ,  $d > 0$  is an element of  $\text{SDP}(2)$  with determinant  $d^2$ . Let  $m$  be the point representing  $\mathcal{T}$  and  $P$  that representing  $d\mathcal{T}$ . An easy verification shows that the projection of  $p$  of  $P$  in the  $x_0$ -plane is obtained by applying the homothety of center the origin and of ratio  $d$  to the point  $m$ .

The Riemannian structure of  $\text{SSDP}(2)$  is transported to the open unit ball as follows. Consider two structure tensors  $\mathcal{T}_1$  and  $\mathcal{T}_2$  with determinants  $d_1^2$  and  $d_2^2$ . Define  $\bar{\mathcal{T}}_i = \frac{1}{d_i} \mathcal{T}_i$ ,  $i = 1, 2$  that are in  $\text{SSDP}(2)$ . The geodesic  $\mathcal{G}(t)$  between  $\mathcal{T}_1$  and  $\mathcal{T}_2$  can be parameterized by [1]

$$\mathcal{G} : [0, 1] \rightarrow \text{SDP}(2) \quad \text{such that} \quad \mathcal{G}(t) = \mathcal{T}_1^{1/2} e^{t \log(\mathcal{T}_1^{-1/2} \mathcal{T}_2 \mathcal{T}_1^{-1/2})} \mathcal{T}_1^{1/2}$$

A simple algebraic manipulation shows that

$$\mathcal{G}(t) = d_1^{1-t} d_2^t \bar{\mathcal{T}}_1^{1/2} e^{t \log(\bar{\mathcal{T}}_1^{-1/2} \bar{\mathcal{T}}_2 \bar{\mathcal{T}}_1^{-1/2})} \bar{\mathcal{T}}_1^{1/2} = d_1^{1-t} d_2^t \bar{\mathcal{G}}(t),$$

where  $\bar{\mathcal{G}}(t)$  is the geodesic in  $\text{SSDP}(2)$  between  $\bar{\mathcal{T}}_1$  and  $\bar{\mathcal{T}}_2$ . In the sphere model the corresponding geodesic is obtained very simply as follows. Let  $m_1$  and  $m_2$  be the two points of the open unit disk

centered at the origin in the plane of equation  $x_0 = 0$  (this is the representation of SSDP(2)). The geodesic between  $m_1$  and  $m_2$  is the circular arc going through  $m_1$  and  $m_2$  orthogonal to the unit circle. Let  $m_t$  be the point of this geodesic representing  $\bar{\mathcal{G}}(t)$ . When  $t$  varies from 0 to 1, the point  $m_t$  traces the geodesic arc between  $m_1$  and  $m_2$ . According to a previous remark, the projection in the  $(x_1, x_2)$  plane of the point  $P_t$  representing the tensor  $\mathcal{G}(t)$  is obtained by applying the homothety of center the origin and ratio  $d(t) = d_1^{1-t}d_2^t$  to  $m_t$  and its  $x_0$ -coordinate is  $1 - d(t)$  if  $d(t) \leq 1$  and  $1/d(t) - 1$  if  $d(t) \geq 1$ .

## References

1. Moakher M (2005) A differential geometric approach to the geometric mean of symmetric positive-definite matrices. SIAM J Matrix Anal Appl 26: 735–747.
